# Supplementary material
Source: ML conference proceedings conference paper supplement (https://proceedings.neurips.cc/paper_files/paper/2010/hash/2723d092b63885e0d7c260cc007e8b9d-Abstract.html)
Supplement: Supplementary file 1 [file 2723d092b63885e0d7c260cc007e8b9d-Supplemental.zip]

---

# Sparse Inverse Covariance Selection via Alternating Linearization Methods (Supplementary Material)

---

**Katya Scheinberg**  
Department of ISE  
Lehigh University  
katyas@lehigh.edu

**Shiqian Ma, Donald Goldfarb**  
Department of IEOR  
Columbia University  
{sm2756, goldfarb}@columbia.edu

## Appendix

This appendix is mainly devoted to the proof of Theorem 2.1 in [1]. For clarity, we recall Algorithm 2 and Theorem 2.1 in [1].

The problem considered in [1] is

$$\min \quad F(x) \equiv f(x) + g(x). \quad (1)$$

---

**Algorithm 2** Alternating linearization method with skipping step

---

**Input:**  $x^0 = y^0$   
**for**  $k = 0, 1, \dots$  **do**  
    1. Solve  $x^{k+1} := \arg \min_x Q(x, y^k) \equiv f(x) + g(y^k) - \langle \lambda^k, x - y^k \rangle + \frac{1}{2\mu} \|x - y^k\|_2^2$ ;  
    2. If  $F(x^{k+1}) > Q(x^{k+1}, y^k)$  **then**  $x^{k+1} := y^k$ .  
    3. Solve  $y^{k+1} := \arg \min_y Q_f(x^{k+1}, y)$ ;  
    4.  $\lambda^{k+1} = \nabla f(x^{k+1}) - (x^{k+1} - y^{k+1})/\mu$ .  
**end for**

---

**Theorem 2.1.** Assume  $\nabla f$  is Lipschitz continuous with constant  $L(f)$ . For  $\beta/L(f) \leq \mu \leq 1/L(f)$  where  $0 < \beta \leq 1$ , Algorithm 2 satisfies

$$F(y^k) - F(x^*) \leq \frac{\|x^0 - x^*\|^2}{2\mu(k + k_n)}, \forall k, \quad (2)$$

where  $x^*$  is an optimal solution of (1) and  $k_n$  is the number of iterations until the  $k$ -th for which  $F(x^{k+1}) \leq Q(x^{k+1}, y^k)$ . Thus Algorithm 2 produces a sequence which converges to the optimal solution in function value, and the number of iterations needed is  $O(1/\epsilon)$  for an  $\epsilon$ -optimal solution.

To prove Theorem 2.1, we need the following definitions and a lemma which is a generalization of Lemma 2.3 in [2]. Let  $\Psi : \mathbb{R}^n \rightarrow \mathbb{R}$  and  $\Phi : \mathbb{R}^n \rightarrow \mathbb{R}$  be convex functions and define

$$Q_\psi(u, v) := \phi(u) + \psi(v) + \langle \gamma_\psi(v), u - v \rangle + \frac{1}{2\mu} \|u - v\|_2^2,$$

where  $\gamma_\psi(v)$  is any subgradient in the subdifferential  $\partial\psi(v)$  of  $\psi(v)$  at the point  $v$ , and

$$p_\psi(v) := \arg \min_u Q_\psi(u, v). \quad (3)$$

**Lemma A-1.** Let  $\Phi(\cdot) = \phi(\cdot) + \psi(\cdot)$ . For any  $v$ , if

$$\Phi(p_\psi(v)) \leq Q_\psi(p_\psi(v), v), \quad (4)$$

then for any  $u$ ,

$$2\mu(\Phi(u) - \Phi(p_\psi(v))) \geq \|p_\psi(v) - u\|^2 - \|v - u\|^2. \quad (5)$$

*Proof.* From (4), we have

$$\begin{aligned} \Phi(u) - \Phi(p_\psi(v)) &\geq \Phi(u) - Q_\psi(p_\psi(v), v) \\ &= \Phi(u) - \left( \phi(p_\psi(v)) + \psi(v) + \langle \gamma_\psi(v), p_\psi(v) - v \rangle + \frac{1}{2\mu} \|p_\psi(v) - v\|_2^2 \right). \end{aligned} \quad (6)$$

Now since  $\phi$  and  $\psi$  are convex we have

$$\phi(u) \geq \phi(p_\psi(v)) + \langle u - p_\psi(v), \gamma_\phi(p_\psi(v)) \rangle, \quad (7)$$

$$\psi(u) \geq \psi(v) + \langle u - v, \gamma_\psi(v) \rangle, \quad (8)$$

where  $\gamma_\phi(\cdot)$  is a subgradient of  $\phi(\cdot)$  and  $\gamma_\phi(p_\psi(v))$  satisfies the first-order optimality conditions for (3), i.e.,

$$\gamma_\phi(p_\psi(v)) + \gamma_\psi(v) + \frac{1}{\mu}(p_\psi(v) - v) = 0. \quad (9)$$

Summing (7) and (8) yields

$$\Phi(u) \geq \phi(p_\psi(v)) + \langle u - p_\psi(v), \gamma_\phi(p_\psi(v)) \rangle + \psi(v) + \langle u - v, \gamma_\psi(v) \rangle. \quad (10)$$

Therefore, from (6), (9) and (10) it follows that

$$\begin{aligned} \Phi(u) - \Phi(p_\psi(v)) &\geq \langle \gamma_\psi(v) + \gamma_\phi(p_\psi(v)), u - p_\psi(v) \rangle - \frac{1}{2\mu} \|p_\psi(v) - v\|_2^2 \\ &= \langle -\frac{1}{\mu}(p_\psi(v) - v), u - p_\psi(v) \rangle - \frac{1}{2\mu} \|p_\psi(v) - v\|_2^2 \\ &= \frac{1}{2\mu} (\|p_\psi(v) - u\|^2 - \|u - v\|^2). \end{aligned}$$

□

*Proof. [Proof of Theorem 2.1]* Let  $I$  be the set of all iteration indices until  $k - 1$ -st for which no skipping occurs and let  $I_c$  be its complement. Let  $I = \{n_i\}$ ,  $i = 0, \dots, k_n - 1$ . It follows that for all  $n \in I_c$   $x^{n+1} = y^n$ .

For  $n \in I$  we can apply Lemma A-1 to obtain the following inequalities. In (5), by letting  $\psi = f$ ,  $\phi = g$ ,  $u = x^*$  and  $u = x^{n+1}$ , we get  $p_\psi(v) = y^{n+1}$ ,  $\Phi = F$  and

$$2\mu(F(x^*) - F(y^{n+1})) \geq \|y^{n+1} - x^*\|^2 - \|x^{n+1} - x^*\|^2. \quad (11)$$

Similarly, by letting  $\psi = g$ ,  $\phi = f$ ,  $u = x^*$  and  $v = y^n$  in (5) we get  $p_g(v) = x^{n+1}$ ,  $\Phi = F$  and

$$2\mu(F(x^*) - F(x^{n+1})) \geq \|x^{n+1} - x^*\|^2 - \|y^n - x^*\|^2. \quad (12)$$

Taking the summation of (11) and (12) we get

$$2\mu(2F(x^*) - F(x^{n+1}) - F(y^{n+1})) \geq \|y^{n+1} - x^*\|^2 - \|y^n - x^*\|^2. \quad (13)$$

For  $n \in I_c$ , (11) holds, and we get

$$2\mu(F(x^*) - F(y^{n+1})) \geq \|y^{n+1} - x^*\|^2 - \|y^n - x^*\|^2, \quad (14)$$

due to the fact that  $x^{n+1} = y^n$  in this case.

Summing (13) and (14) over  $n = 0, 1, \dots, k - 1$  we get

$$\begin{aligned} &2\mu((2|I| + |I_c|)F(x^*) - \sum_{n \in I} F(x^{n+1}) - \sum_{n=0}^{k-1} F(y^{n+1})) \\ &\geq \sum_{n=0}^{k-1} (\|y^{n+1} - x^*\|^2 - \|y^n - x^*\|^2) \\ &= \|y^k - x^*\|^2 - \|y^0 - x^*\|^2 \\ &\geq -\|x^0 - x^*\|^2. \end{aligned} \quad (15)$$

For any  $n$ , since Lemma A-1 holds for any  $u$ , letting  $u = x^{n+1}$  instead of  $x^*$  we get from (11) that

$$2\mu(F(x^{n+1}) - F(y^{n+1})) \geq \|y^{n+1} - x^{n+1}\|^2 \geq 0, \quad (16)$$

or, equivalently,

$$2\mu(F(x^n) - F(y^n)) \geq \|y^n - x^n\|^2 \geq 0. \quad (17)$$

Similarly, for  $n \in I$  by letting  $u = y^n$  instead of  $x^*$  we get from (12) that

$$2\mu(F(y^n) - F(x^{n+1})) \geq \|x^{n+1} - y^n\|^2 \geq 0. \quad (18)$$

On the other hand, for  $n \in I_c$ , (18) also holds because  $x^{n+1} = y^n$ , and hence holds for all  $n$ .

Adding (16) and (18) we obtain

$$2\mu(F(y^n) - F(y^{n+1})) \geq 0. \quad (19)$$

and adding (17) and (18) we obtain

$$2\mu(F(x^n) - F(x^{n+1})) \geq 0. \quad (20)$$

(19) and (20) show that the sequences  $F(y^n)$  and  $F(x^n)$  are non-increasing. Thus we have,

$$\sum_{n=0}^{k-1} F(y^{n+1}) \geq kF(y^k) \quad \text{and} \quad \sum_{n \in I} F(x^{n+1}) \geq k_n F(x^k). \quad (21)$$

Combining (15) and (21) yields

$$2\mu((k + k_n)F(x^*) - k_n F(x^k) - kF(y^k)) \geq -\|x^0 - x^*\|^2. \quad (22)$$

From (17) we know that  $F(x^k) \geq F(y^k)$ . Thus (22) implies that

$$2\mu(k + k_n)(F(y^k) - F(x^*)) \leq \|x^0 - x^*\|^2,$$

which gives us the desired result (2).

Also, for any given  $\epsilon > 0$ , as long as  $k \geq \frac{L(f)\|x^0 - x^*\|^2}{2\beta\epsilon}$ , we have from (2) that  $F(y^k) - F(x^*) \leq \epsilon$ ; i.e., the number of iterations needed is  $O(1/\epsilon)$  for an  $\epsilon$ -optimal solution.  $\square$

## References

- [1] K. Scheinberg, S. Ma, and D. Goldfarb. Sparse inverse covariance selection via alternating linearization methods. In *Proceedings of the Neural Information Processing Systems (NIPS)*, 2010.
- [2] A. Beck and M. Teboulle. A fast iterative shrinkage-thresholding algorithm for linear inverse problems. *SIAM J. Imaging Sciences*, 2(1):183–202, 2009.
