# Supplementary material
Source: ML conference proceedings conference paper supplement (https://proceedings.neurips.cc/paper_files/paper/2010/hash/2723d092b63885e0d7c260cc007e8b9d-Abstract.html)
Supplement: Supplementary file 2 [file 2723d092b63885e0d7c260cc007e8b9d-Supplemental.zip]

Archive with 1 entries (1 files):
- extra/NIPS2010_0109_extra.pdf
